# Supplementary material
Source: Springer Nature journal article supplement (https://www.springermedizin.de/resource/supplementary/12936_2011_2001_MOESM8_ESM.pdf/9543102)

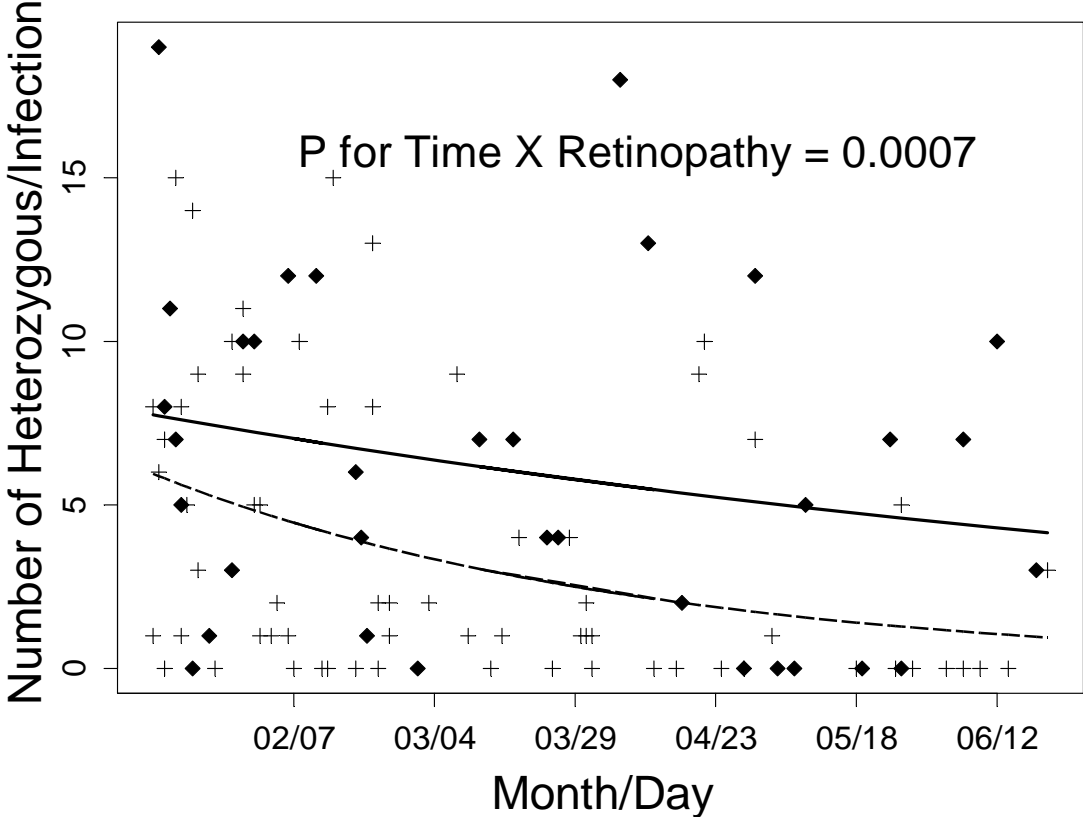

Supplement: MOESM8 [file 9543102]
